# Supplementary material
Source: PubMed Central journal article supplement (PMC9857701)
Supplement: jamaophthalmol-e225840-s002.pdf [file jamaophthalmol-e225840-s002.pdf]

## Data Sharing Statement

Killeen. Population Prevalence of Vision Impairment in US Adults 71 Years and Older. *JAMA Ophthalmol*. Published January 12, 2023. doi:10.1001/jamaophthalmol.2022.5840

### Data

**Data available:** No

### Additional Information

**Explanation for why data not available:** Data is already publicly available at <https://www.nhats.org/>.
